# Supplementary material for: Co-catalysis of a bi-functional ligand containing phosphine and Lewis acidic phosphonium for hydroformylation–acetalization of olefins
Source: Royal Society of Chemistry journal article supplement (doi:10.1039/c5gc02127h), 2015-11-11
Supplement: c5gc02127h1.pdf [file c5gc02127h1.pdf]

## Supplementary Information

The hydroformylation-acetalization of styrene with glycerol was performed under the appointed conditions as indicated in S. Scheme 1 for two times. The combined mixture was purified by column chromatography on silica gel with the eluent of petroleum ether/ ethyl acetate (10:1~4:1). Since besides of the left glycerol, the oxo-products is composed of (linear and branched) phenylpropanals (**a** and **b**) and the corresponding five-member-/six-member-ring acetals (**c-f**) with very similar polarity, it is very difficult to isolate every product. With our best effort, only the mixed acetalized products of **e** ((2-phenethyl-1,3-dioxolan-4-yl)methanol) and **f** (2-phenethyl-1,3-dioxan-5-ol) was obtained in the low yield.  $^1\text{H}$  NMR ( $\delta$ , ppm,  $\text{CDCl}_3$ ) for **f**: 7.19-7.14 (5H, m), 4.51-4.49 (1H, t), 4.17-4.08 (2H, m), 4.00-3.97 (3H, m), 3.48-3.47 (1H, t), 2.76-2.68 (2H, m), 2.02-1.89 (2H, m).

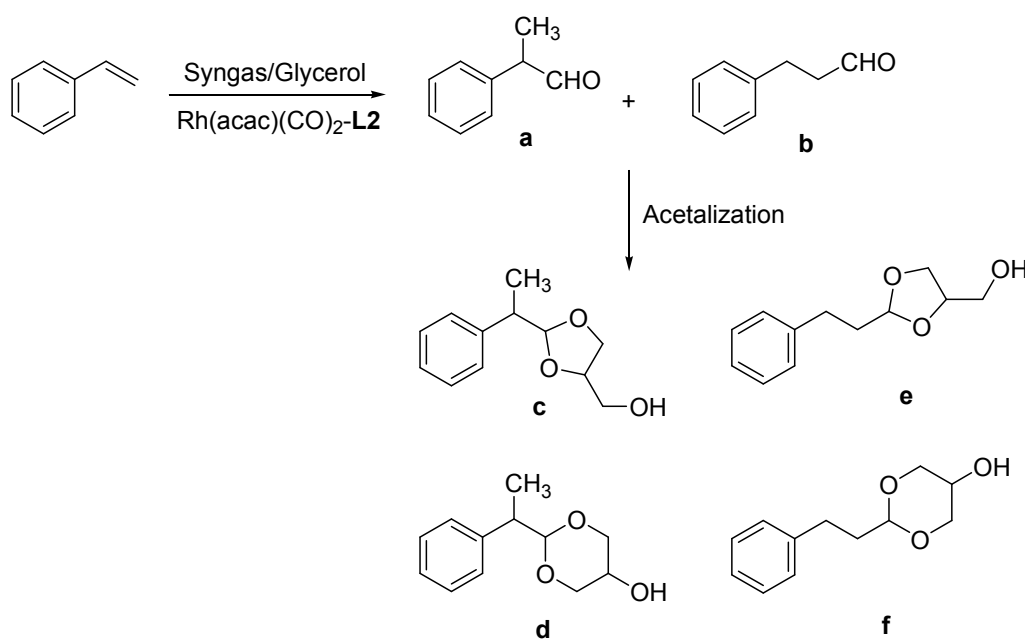

**S. Scheme 1** The hydroformylation-acetalization of styrene with glycerol [Reaction conditions:  $\text{Rh}(\text{acac})(\text{CO})_2$  0.01 mmol, olefin 20 mmol (S/C=2000), **L2** 0.06 mmol (P/Rh=6:1),  $\text{CO}/\text{H}_2$  (1:1) 4.0 MPa, temperature 120 °C, glycerol 5 mL, reaction time 2 h.]

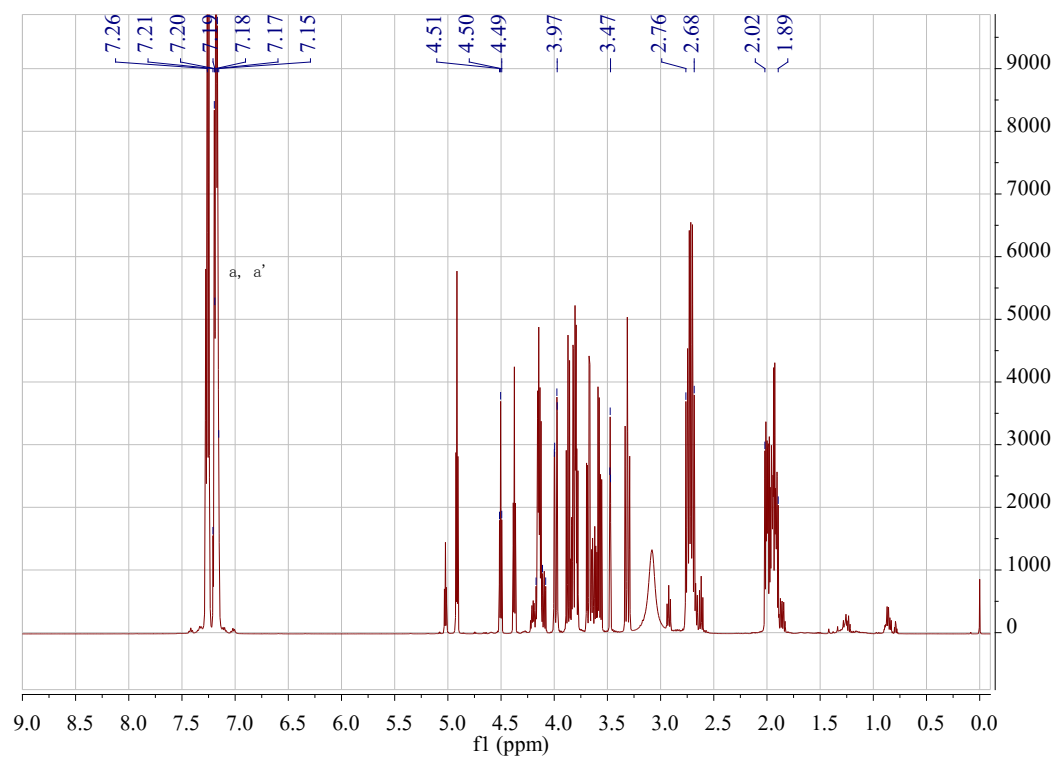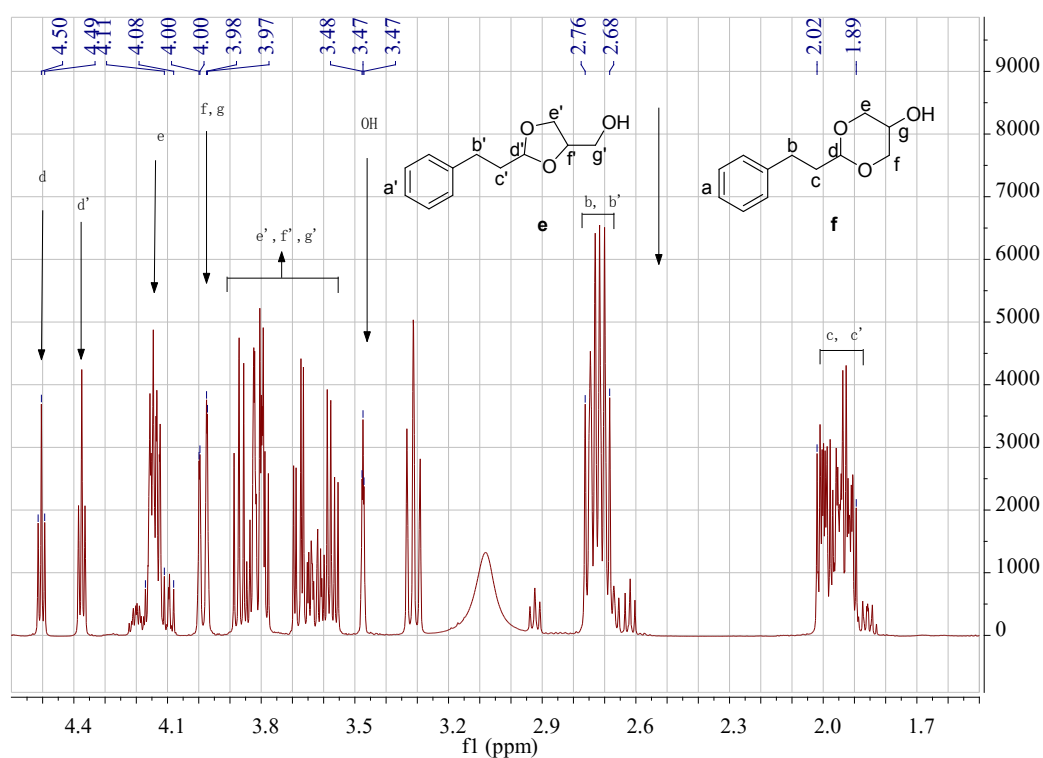

The investigation on the effect of  $I^-$  (TABI, tetrabutylammonium iodide) on the performance of **L1**, **L3**, and **L4** was supplemented in S. Table 1. It was shown that the involved  $I^-$  had no effect on the reaction results.

**S. Table 1** The effect of I<sup>-</sup> on homogeneous hydroformylation-acetalization with the presence of different ligands <sup>a</sup>

| <div style="display: flex; justify-content: space-around; align-items: center;"> <div style="text-align: center;"> 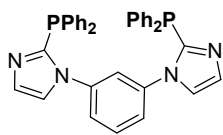 <p><b>L1</b></p> </div> <div style="text-align: center;">  <p><b>L2</b></p> </div> <div style="text-align: center;">  <p><b>L3</b></p> </div> <div style="text-align: center;">  <p><b>L4</b></p> </div> </div> |           |                |                           |                                        |                                            |                                                |                  |                                 |
|----------------------------------------------------------------------------------------------------------------------------------------------------------------------------------------------------------------------------------------------------------------------------------------------------------------------------------------------------------------------------------------------------------------------------------------------------------------------------------------------------------------------------------------------------------------------------------------------------------------------------------------------------------------------------|-----------|----------------|---------------------------|----------------------------------------|--------------------------------------------|------------------------------------------------|------------------|---------------------------------|
| Entry                                                                                                                                                                                                                                                                                                                                                                                                                                                                                                                                                                                                                                                                      | Ligand    | TABI<br>(mmol) | Conv.<br>(%) <sup>b</sup> | S <sub>oxo</sub><br>(%) <sup>b,c</sup> | P <sub>acetals</sub><br>(%) <sup>b,c</sup> | S <sub>iso-octenes</sub><br>(%) <sup>b,c</sup> | L/B <sup>d</sup> | TON <sub>oxo</sub> <sup>e</sup> |
| 1                                                                                                                                                                                                                                                                                                                                                                                                                                                                                                                                                                                                                                                                          | <b>L2</b> | --             | 91                        | 94                                     | 62                                         | 6                                              | 1.9              | 1710                            |
| 2                                                                                                                                                                                                                                                                                                                                                                                                                                                                                                                                                                                                                                                                          | <b>L1</b> | 0.015          | 65                        | 88                                     | 2                                          | 12                                             | 2.1              | 1140                            |
| 3                                                                                                                                                                                                                                                                                                                                                                                                                                                                                                                                                                                                                                                                          | <b>L3</b> | 0.015          | 86                        | 90                                     | 27                                         | 10                                             | 2.4              | 1550                            |
| 4                                                                                                                                                                                                                                                                                                                                                                                                                                                                                                                                                                                                                                                                          | <b>L4</b> | 0.015          | 76                        | 88                                     | 2                                          | 12                                             | 1.9              | 1350                            |

<sup>a</sup> Rh(acac)(CO)<sub>2</sub> 0.0025 mmol, 1-octene 5.0 mmol (S/C=2000, Rh 0.05 mol%), P/Rh=6:1 molar ratio (**L1** or **L3** 0.0075 mmol; **L2** or **L4** 0.015 mmol), CO/H<sub>2</sub> (1:1) 4.0 MPa, MeOH 3 mL, 80 °C, reaction time 6 h; <sup>b</sup> Determined by GC; <sup>c</sup> S<sub>oxo</sub>=(aldehydes+acetals)/(aldehydes+acetals+iso-octenes), P<sub>acetals</sub> =acetals/(aldehydes+acetals), percentage of acetals in the total oxo-products; S<sub>iso-octenes</sub>=iso-octenes/(aldehydes+acetals+iso-octenes); <sup>d</sup> L/B, the ratio of linear nonanals and acetals to branched nonanals and acetals; <sup>e</sup> TON<sub>oxo</sub> (turnover number)=mol of oxo products·(mol of Rh)<sup>-1</sup>.
